# Supplementary material
Source: Springer Nature journal article supplement (https://www.springermedizin.de/resource/supplementary/13014_2010_289_MOESM4_ESM.pdf/9633362)

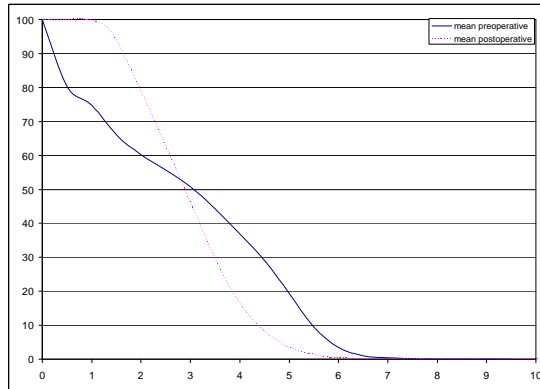

**A**

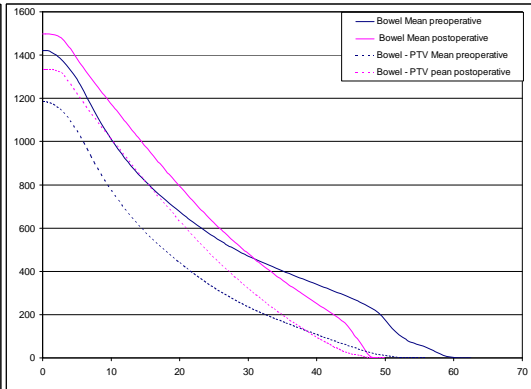

**B**

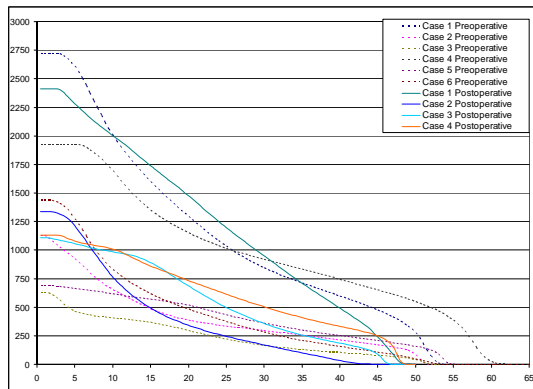

**C**

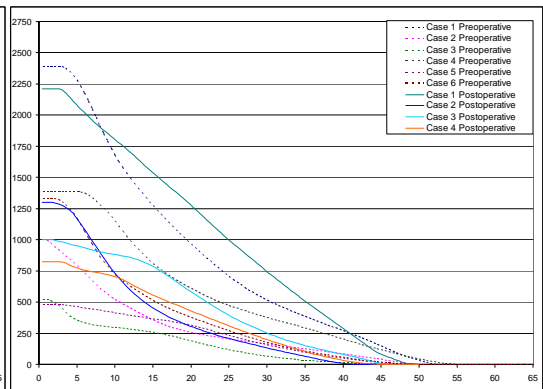

**D**

Supplement: MOESM4 [file 9633362]
